# Supplementary material for: Latent constructs of the students' assessment of their learning gains instrument following instruction in stereochemistry
Source: Royal Society of Chemistry journal article supplement (doi:10.1039/c5rp00214a), 2016-01-01
Supplement: c5rp00214a1.pdf [file c5rp00214a1.pdf]

## Appendix 1: SALG Instrument

### Student Assessment of their Learning Gains

#### Instructions:

Please fill in one box only for the following statements corresponding to the scale indicated by completely filling the circle ● with a blue or black ballpoint pen.

#### Active Learning

HOW MUCH did each of the following aspects of the class HELP YOUR LEARNING?

|                                                                                                             | No help | A little help | Moderate help | Much help | Great help |
|-------------------------------------------------------------------------------------------------------------|---------|---------------|---------------|-----------|------------|
| 1 Attending class                                                                                           | 1       | 2             | 3             | 4         | 5          |
| 2 The pace of class                                                                                         | 1       | 2             | 3             | 4         | 5          |
| 3 Working with peers                                                                                        | 1       | 2             | 3             | 4         | 5          |
| 4 Working with peers outside the class                                                                      | 1       | 2             | 3             | 4         | 5          |
| 5 Explanation of instructor for involving small groups                                                      | 1       | 2             | 3             | 4         | 5          |
| 6 Explanation of why the class focus on topics presented                                                    | 1       | 2             | 3             | 4         | 5          |
| 7 Participating in class discussions during class                                                           | 1       | 2             | 3             | 4         | 5          |
| 8 Listening to discussions                                                                                  | 1       | 2             | 3             | 4         | 5          |
| 9 Participating in group work during class                                                                  | 1       | 2             | 3             | 4         | 5          |
| 10 Class activities help learning                                                                           | 1       | 2             | 3             | 4         | 5          |
| 11 The number and spacing of tests                                                                          | 1       | 2             | 3             | 4         | 5          |
| 12 The feedback on my work received during and after tutorials                                              | 1       | 2             | 3             | 4         | 5          |
| 13 Connecting key ideas to other knowledge                                                                  | 1       | 2             | 3             | 4         | 5          |
| 14 Confidence that you understand the material                                                              | 1       | 2             | 3             | 4         | 5          |
| 15 <i>Grading system what I need to work</i>                                                                | 1       | 2             | 3             | 4         | 5          |
| 16 Comfort level in working complex ideas                                                                   | 1       | 2             | 3             | 4         | 5          |
| 17 Confidence in ability to do POGIL activities                                                             | 1       | 2             | 3             | 4         | 5          |
| 18 <i>Willingness to seek help from others (instructor, peers, tutor) when working on academic problems</i> | 1       | 2             | 3             | 4         | 5          |

#### Concept Learning

As a result of your work in this class, what GAINS DID YOU MAKE in your UNDERSTANDING of each of the following?

|                                                                                           |   |   |   |   |   |
|-------------------------------------------------------------------------------------------|---|---|---|---|---|
| 19 SN1 SN2 reaction mechanism                                                             | 1 | 2 | 3 | 4 | 5 |
| 20 Distinguishing different types of isomers                                              | 1 | 2 | 3 | 4 | 5 |
| 21 Classifying compounds as chiral/achiral                                                | 1 | 2 | 3 | 4 | 5 |
| 22 Identifying StereoCentres in molecules                                                 | 1 | 2 | 3 | 4 | 5 |
| 23 Attractive forces between molecules and effect on physical properties                  | 1 | 2 | 3 | 4 | 5 |
| 24 Applying curved arrow conventions to describe bond forming and bond breaking processes | 1 | 2 | 3 | 4 | 5 |
| 25 The reactions of alkyl halides and nucleophilic substitutions                          | 1 | 2 | 3 | 4 | 5 |

#### Resources

HOW MUCH did each of the following aspects of the class HELP YOUR LEARNING?

|                                           |   |   |   |   |   |
|-------------------------------------------|---|---|---|---|---|
| 26 Mini lectures posted on the Blackboard | 1 | 2 | 3 | 4 | 5 |
| 27 Pencasts posted on the Blackboard      | 1 | 2 | 3 | 4 | 5 |
| 28 Pencasts solutions homework problems   | 1 | 2 | 3 | 4 | 5 |
| 29 Clickers during instruction            | 1 | 2 | 3 | 4 | 5 |

#### Process Skills

As a result of your work in this class, what GAINS DID YOU MAKE in the following SKILLS?

|                                                                 |   |   |   |   |   |
|-----------------------------------------------------------------|---|---|---|---|---|
| 30 Identifying patterns in data                                 | 1 | 2 | 3 | 4 | 5 |
| 31 Recognizing a sound argument and appropriate use of evidence | 1 | 2 | 3 | 4 | 5 |
| 32 Developing a logical argument                                | 1 | 2 | 3 | 4 | 5 |
