# Supplementary material for: Latent constructs of the students' assessment of their learning gains instrument following instruction in stereochemistry
Source: Royal Society of Chemistry journal article supplement (doi:10.1039/c5rp00214a), 2016-01-01
Supplement: c5rp00214a2.pdf [file c5rp00214a2.pdf]

## Appendix 2: Exploratory Factor Analyses

### KMO and Bartlett's Test

|                                                  |                    |
|--------------------------------------------------|--------------------|
| Kaiser-Meyer-Olkin Measure of Sampling Adequacy. | .785               |
| Bartlett's Test of Sphericity                    | Approx. Chi-Square |
|                                                  | 2196.521           |
|                                                  | df                 |
|                                                  | 528                |
|                                                  | Sig.               |
|                                                  | .000               |

### Total Variance Explained

| Factor | Initial Eigenvalues |               |              | Extraction Sums of Squared Loadings |               |              | Rotation Sums of Squared Loadings |               |              |
|--------|---------------------|---------------|--------------|-------------------------------------|---------------|--------------|-----------------------------------|---------------|--------------|
|        | Total               | % of Variance | Cumulative % | Total                               | % of Variance | Cumulative % | Total                             | % of Variance | Cumulative % |
|        |                     |               |              |                                     |               |              |                                   |               |              |
| 1      | 9.457               | 28.658        | 28.658       | 8.931                               | 27.064        | 27.064       | 5.981                             | 18.123        | 18.123       |
| 2      | 2.856               | 8.655         | 37.314       | 2.427                               | 7.354         | 34.418       | 3.529                             | 10.693        | 28.816       |
| 3      | 2.635               | 7.985         | 45.299       | 2.211                               | 6.701         | 41.119       | 3.079                             | 9.330         | 38.146       |
| 4      | 1.902               | 5.765         | 51.064       | 1.543                               | 4.675         | 45.794       | 2.524                             | 7.648         | 45.794       |
| 5      | 1.670               | 5.061         | 56.125       |                                     |               |              |                                   |               |              |
| 6      | 1.512               | 4.583         | 60.708       |                                     |               |              |                                   |               |              |
| 7      | 1.269               | 3.846         | 64.553       |                                     |               |              |                                   |               |              |
| 8      | 1.103               | 3.344         | 67.897       |                                     |               |              |                                   |               |              |
| 9      | .976                | 2.957         | 70.854       |                                     |               |              |                                   |               |              |
| 10     | .928                | 2.811         | 73.665       |                                     |               |              |                                   |               |              |
| 11     | .846                | 2.563         | 76.228       |                                     |               |              |                                   |               |              |
| 12     | .808                | 2.449         | 78.677       |                                     |               |              |                                   |               |              |
| 13     | .767                | 2.323         | 81.000       |                                     |               |              |                                   |               |              |
| 14     | .666                | 2.017         | 83.017       |                                     |               |              |                                   |               |              |
| 15     | .604                | 1.830         | 84.847       |                                     |               |              |                                   |               |              |
| 16     | .578                | 1.750         | 86.598       |                                     |               |              |                                   |               |              |
| 17     | .545                | 1.651         | 88.248       |                                     |               |              |                                   |               |              |
| 18     | .478                | 1.447         | 89.695       |                                     |               |              |                                   |               |              |
| 19     | .445                | 1.347         | 91.043       |                                     |               |              |                                   |               |              |
| 20     | .411                | 1.244         | 92.287       |                                     |               |              |                                   |               |              |
| 21     | .363                | 1.099         | 93.386       |                                     |               |              |                                   |               |              |
| 22     | .308                | .934          | 94.320       |                                     |               |              |                                   |               |              |
| 23     | .279                | .846          | 95.166       |                                     |               |              |                                   |               |              |
| 24     | .262                | .795          | 95.960       |                                     |               |              |                                   |               |              |
| 25     | .224                | .678          | 96.639       |                                     |               |              |                                   |               |              |
| 26     | .204                | .618          | 97.257       |                                     |               |              |                                   |               |              |
| 27     | .184                | .557          | 97.814       |                                     |               |              |                                   |               |              |
| 28     | .172                | .522          | 98.336       |                                     |               |              |                                   |               |              |
| 29     | .161                | .488          | 98.825       |                                     |               |              |                                   |               |              |
| 30     | .134                | .405          | 99.229       |                                     |               |              |                                   |               |              |
| 31     | .105                | .318          | 99.548       |                                     |               |              |                                   |               |              |

|    |      |      |         |  |  |  |  |  |  |
|----|------|------|---------|--|--|--|--|--|--|
| 32 | .079 | .240 | 99.788  |  |  |  |  |  |  |
| 33 | .070 | .212 | 100.000 |  |  |  |  |  |  |

Extraction Method: Principal Axis Factoring.

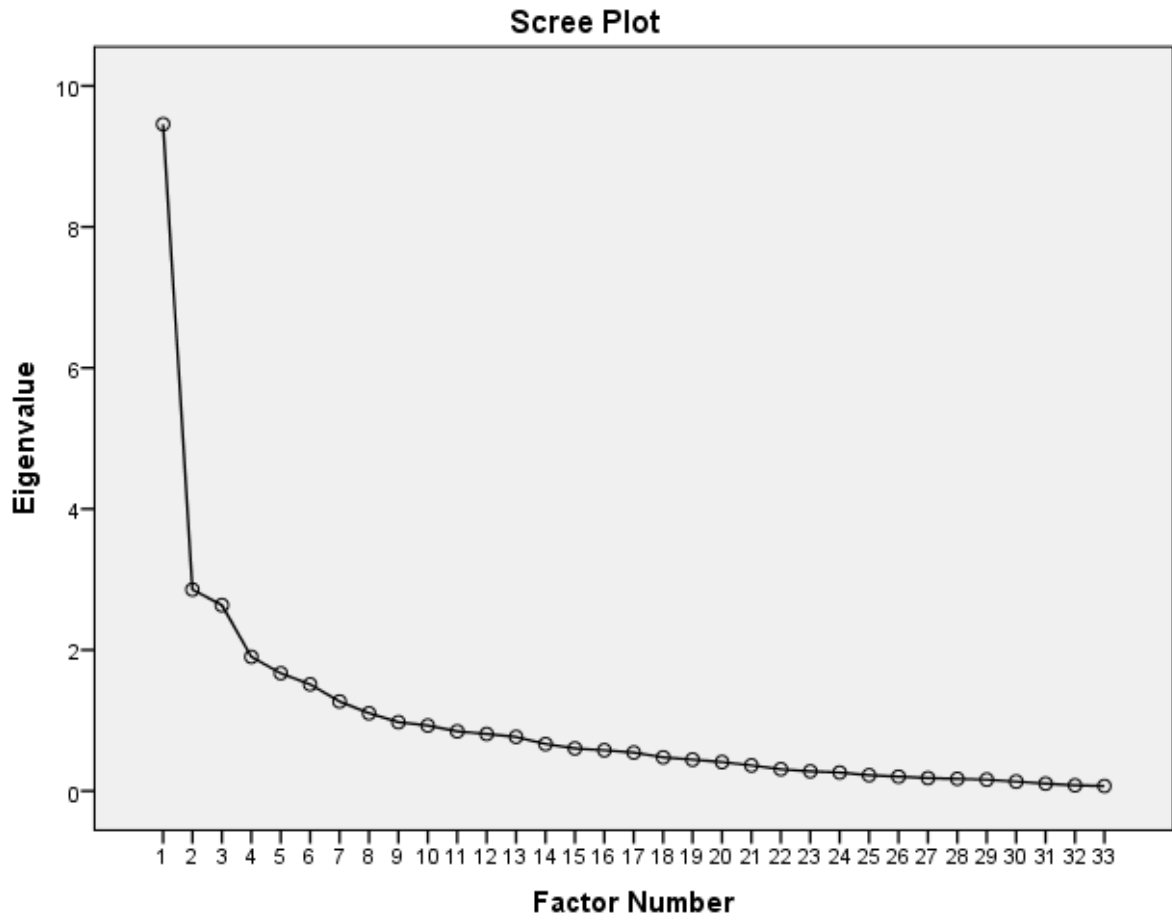

**Rotated Factor Matrix<sup>a</sup>**

| Item No |                                                     | Factor          |                  |           |                |
|---------|-----------------------------------------------------|-----------------|------------------|-----------|----------------|
|         |                                                     | Active Learning | Concept Learning | Resources | Process Skills |
| 1       | Pace_of_class_5.3                                   | .447            |                  |           |                |
| 2       | Attending_class_6.1                                 | .546            |                  |           |                |
| 3       | Working_with_Peers_10.3                             | .602            |                  |           |                |
| 4       | Working_with_Peers_outside_10.4                     | .423            |                  |           |                |
| 5       | Explanation_instructor_why_small_groups_9.2         | .475            |                  |           |                |
| 6       | Explanation_why_focus_topics_presented_9.3          | .522            |                  |           |                |
| 7       | Confidence_understanding_material_G3.4              | .644            |                  |           |                |
| 8       | Confidence_can_do_3.5                               | .618            |                  |           |                |
| 9       | Comfort_lvl_complex_ideas_3.6                       | .636            |                  |           |                |
| 10      | Participating_class_discussions_6.2                 | .487            |                  |           |                |
| 11      | Listening_to_discussions_6.3                        | .619            |                  |           |                |
| 12      | Participating_Group_Work_6.4                        | .706            |                  |           |                |
| 13      | Class_Activities_help_lng_6.5                       | .412            |                  |           |                |
| 14      | Number_spacing_tests_7.1                            | .519            |                  |           |                |
| 15      | Grading_system_what_I_need_to_work_7.4              | .552            |                  |           |                |
| 16      | Feedback_on_my_work_tutorials_7.5                   | .612            |                  |           |                |
| 17      | Connecting_key_ideas_other_knowledge_4.1            | .561            |                  |           |                |
| 18      | <i>Willing_help_others (teacher, peers, TA)_3.7</i> | .610            |                  |           |                |
| 19      | Molecular_Forces_1.3.5                              |                 | .546             |           |                |
| 20      | SN1_SN2_rxn_mechanism_1.3.9                         |                 | .520             |           |                |
| 21      | Distinguishing_Isomers_1.3.10                       |                 | .769             |           |                |
| 22      | Classifying_chiral_achiral_molecules_1.3.11         |                 | .770             |           |                |
| 23      | Identifyinig_StereoCentres_1.3.12                   |                 | .717             |           |                |
| 24      | Ideas_VS_ideas_other_classes_1.4                    |                 | .584             |           |                |
| 25      | Ideas_VS_Major_1.5                                  |                 | .558             |           |                |
| 26      | Mini_lectures_BlackBoard_8.4                        |                 |                  | .796      |                |
| 27      | Pencasts_8.5                                        |                 |                  | .869      |                |
| 28      | Pencasts_solutions_HW_problems_8.6                  |                 |                  | .885      |                |
| 29      | Interacting_with_Instructor_office_hrs_10.2         |                 |                  | .460      |                |
| 30      | Argument_use_of_evidence_G2.2                       |                 |                  |           | .888           |
| 31      | Identify_Data_Pattern_G2.1                          |                 |                  |           | .680           |
| 32      | Develop_logical_argument_2.3                        |                 |                  |           | .801           |

Extraction Method: Principal Axis Factoring.

Rotation Method: Varimax with Kaiser Normalization.

a. Rotation converged in 5 iterations.
