# Supplementary material for: Latent constructs of the students' assessment of their learning gains instrument following instruction in stereochemistry
Source: Royal Society of Chemistry journal article supplement (doi:10.1039/c5rp00214a), 2016-01-01
Supplement: c5rp00214a3.pdf [file c5rp00214a3.pdf]

### Appendix 3: Confirmatory Factor Analyses

Notes for Model (Default model)

#### Computation of degrees of freedom (Default model)

Number of distinct sample moments: 465  
Number of distinct parameters to be estimated: 80  
Degrees of freedom (465 - 80): 385

#### Result (Default model)

Minimum was achieved  
Chi-square = 619.406  
Degrees of freedom = 385  
Probability level = .000

#### Model Fit Summary

##### CMIN

| Model              | NPAR | CMIN     | DF  | P    | CMIN/DF |
|--------------------|------|----------|-----|------|---------|
| Default model      | 80   | 619.406  | 385 | .000 | 1.609   |
| Saturated model    | 465  | .000     | 0   |      |         |
| Independence model | 30   | 3327.417 | 435 | .000 | 7.649   |

##### RMR, GFI

| Model              | RMR  | GFI   | AGFI | PGFI |
|--------------------|------|-------|------|------|
| Default model      | .098 | .801  | .760 | .663 |
| Saturated model    | .000 | 1.000 |      |      |
| Independence model | .470 | .171  | .113 | .160 |

##### Baseline Comparisons

| Model              | NFI<br>Delta1 | RFI<br>rho1 | IFI<br>Delta2 | TLI<br>rho2 | CFI   |
|--------------------|---------------|-------------|---------------|-------------|-------|
| Default model      | .814          | .790        | .920          | .908        | .919  |
| Saturated model    | 1.000         |             | 1.000         |             | 1.000 |
| Independence model | .000          | .000        | .000          | .000        | .000  |

##### Parsimony-Adjusted Measures

| Model              | PRATIO | PNFI | PCFI |
|--------------------|--------|------|------|
| Default model      | .885   | .720 | .813 |
| Saturated model    | .000   | .000 | .000 |
| Independence model | 1.000  | .000 | .000 |

##### NCP

| Model              | NCP      | LO 90    | HI 90    |
|--------------------|----------|----------|----------|
| Default model      | 234.406  | 170.360  | 306.367  |
| Saturated model    | .000     | .000     | .000     |
| Independence model | 2892.417 | 2712.586 | 3079.624 |

### FMIN

| Model              | FMIN   | F0     | LO 90  | HI 90  |
|--------------------|--------|--------|--------|--------|
| Default model      | 4.048  | 1.532  | 1.113  | 2.002  |
| Saturated model    | .000   | .000   | .000   | .000   |
| Independence model | 21.748 | 18.905 | 17.729 | 20.128 |

### RMSEA

| Model              | RMSEA | LO 90 | HI 90 | PCLOSE |
|--------------------|-------|-------|-------|--------|
| Default model      | .063  | .054  | .072  | .012   |
| Independence model | .208  | .202  | .215  | .000   |

### AIC

| Model              | AIC      | BCC      | BIC      | CAIC     |
|--------------------|----------|----------|----------|----------|
| Default model      | 779.406  | 820.062  | 1022.362 | 1102.362 |
| Saturated model    | 930.000  | 1166.311 | 2342.183 | 2807.183 |
| Independence model | 3387.417 | 3402.663 | 3478.525 | 3508.525 |

### ECVI

| Model              | ECVI   | LO 90  | HI 90  | MECVI  |
|--------------------|--------|--------|--------|--------|
| Default model      | 5.094  | 4.676  | 5.564  | 5.360  |
| Saturated model    | 6.078  | 6.078  | 6.078  | 7.623  |
| Independence model | 22.140 | 20.965 | 23.364 | 22.240 |

### HOELTER

| Model              | HOELTER<br>.05 | HOELTER<br>.01 |
|--------------------|----------------|----------------|
| Default model      | 107            | 112            |
| Independence model | 23             | 24             |
